# Supplementary material for: Four new Zn(ii) and Cd(ii) coordination polymers using two amide-like aromatic multi-carboxylate ligands: synthesis, structures and lithium–selenium batteries application
Source: Royal Society of Chemistry journal article supplement (doi:10.1039/c9ra02163a), 2019-01-01
Supplement: c9ra02163a1.pdf [file c9ra02163a1.pdf]

## *Supporting Information*

# **Four new Zn(II) and Cd(II) coordination polymers using two amide-linked aromatic multi-carboxylate ligands: synthesis, structures and electrochemical properties**

Qiuxia Cheng,<sup>a</sup> Luzhu Qin,<sup>a</sup> Chunxian Ke,<sup>a</sup> Jianen Zhou,<sup>a</sup> Jia Lin,<sup>ac</sup> Xiaoming Lin,<sup>\*ab</sup> Gang Zhang<sup>d</sup> and Yuepeng Cai<sup>\*a</sup>

<sup>a</sup> Key Laboratory of Theoretical Chemistry of Environment, Ministry of Education, School of Chemistry and Environment, South China Normal University, Guangzhou 510006, P. R. China

<sup>b</sup> School of Environment and Energy, South China University of Technology, Guangzhou, Guangdong 510006, China

<sup>c</sup> Key Laboratory of Theoretical Chemistry of Environment, Ministry of Education, School of Chemistry and Environment, South China Normal University, Guangzhou 510006, PR China

<sup>d</sup> State Key Laboratory of Supramolecular Structure and Materials, College of Chemistry, Jilin University, Changchun 130012, PR China

### Contents

1. **Table S1** Selected bond lengths and angles for compounds **1-4**.
2. **Fig. S1**. Crystal structure of 3-H<sub>2</sub>PBI ligand.
3. **Fig. S2**. Crystal structure of 4-H<sub>2</sub>PBI ligand.
4. **Fig. S3**. FT-IR spectrum of the obtained compounds **1-4**.
5. **Fig. S4**. PXRD patterns of compounds **1-4**.
6. **Fig. S5**. Schematic view of the 2D layers in compound **1**.
7. **Fig. S6**. TG curves of compounds **1-4**.
8. **Fig. S7**. N<sub>2</sub> adsorption/desorption isotherms of Cd-CP at 77 K.

**Table S1.** Selected Bond Distances (Å) and Angles (°) for compounds **1-4**

| compound <b>1</b> |            |                     |            |
|-------------------|------------|---------------------|------------|
| Zn(1)-O(4)#1      | 1.956(4)   | O(4)#1-Zn(1)-O(1W)  | 117.97(15) |
| Zn(1)-O(1W)       | 1.972(4)   | O(4)#1-Zn(1)-O(2)#2 | 96.17(15)  |
| Zn(1)-O(2)#2      | 1.968(4)   | O(1W)-Zn(1)-O(2)#2  | 114.45(16) |
| Zn(1)-N(2)        | 2.043(5)   | O(4)#1-Zn(1)-N(2)   | 106.25(16) |
| Zn(1)-C(1)#2      | 2.577(5)   | O(1W)-Zn(1)-N(2)    | 101.98(17) |
| C(1)-Zn(1)#2      | 2.577(5)   | O(2)#2-Zn(1)-N(2)   | 120.71(17) |
| O(2)-Zn(1)#2      | 1.968(4)   | O(4)#1-Zn(1)-C(1)#2 | 124.89(17) |
| O(4)-Zn(1)#1      | 1.956(3)   | O(1W)-Zn(1)-C(1)#2  | 97.29(16)  |
| N(2)-Zn(1)-C(1)#2 | 105.86(17) | O(2)#2-Zn(1)-C(1)#2 | 28.74(17)  |
| O(1)-C(1)-Zn(1)#2 | 73.9(3)    | C(18)-N(2)-Zn(1)    | 119.7(3)   |
| O(2)-C(1)-Zn(1)#2 | 48.0(2)    | C(17)-N(2)-Zn(1)    | 122.5(3)   |
| C(5)-C(1)-Zn(1)#2 | 164.6(4)   | C(1)-O(2)-Zn(1)#2   | 103.2(3)   |
| C(2)-O(4)-Zn(1)#1 | 114.8(3)   | Zn(1)-O(1W)-H(6B)   | 120.0      |
| Zn(1)-O(1W)-H(6C) | 120.0      |                     |            |

Symmetry transformations used to generate equivalent atoms: #1 -x+2,-y+2,-z+2; #2 -x+2,-y+2,-z+1

| compound <b>2</b>  |           |                     |            |
|--------------------|-----------|---------------------|------------|
| Cd(1)-O(4)#1       | 2.272(4)  | O(4)#1-Cd(1)-O(3)#2 | 127.92(14) |
| Cd(1)-O(3)#2       | 2.282(4)  | O(4)#1-Cd(1)-O(6)   | 80.88(17)  |
| Cd(1)-O(6)         | 2.314(4)  | O(3)#2-Cd(1)-O(6)   | 88.42(17)  |
| Cd(1)-N(2)#3       | 2.323(5)  | O(4)#1-Cd(1)-N(2)#3 | 93.59(17)  |
| Cd(1)-O(2)         | 2.391(3)  | O(3)#2-Cd(1)-N(2)#3 | 92.32(17)  |
| Cd(1)-O(1)         | 2.420(4)  | O(6)-Cd(1)-N(2)#3   | 173.47(17) |
| Cd(1)-C(1)         | 2.729(5)  | O(4)#1-Cd(1)-O(2)   | 89.53(14)  |
| N(2)-Cd(1)#4       | 2.323(5)  | O(3)#2-Cd(1)-O(2)   | 141.46(14) |
| O(3)-Cd(1)#2       | 2.282(4)  | O(6)-Cd(1)-O(2)     | 89.26(16)  |
| O(4)-Cd(1)#5       | 2.272(4)  | N(2)#3-Cd(1)-O(2)   | 94.18(15)  |
| O(6)-Cd(1)-O(1)    | 97.64(15) | O(4)#1-Cd(1)-O(1)   | 143.50(14) |
| N(2)#3-Cd(1)-O(1)  | 88.88(15) | O(3)#2-Cd(1)-O(1)   | 88.27(13)  |
| O(2)-Cd(1)-O(1)    | 53.98(13) | O(4)#1-Cd(1)-C(1)   | 116.28(16) |
| N(2)#3-Cd(1)-C(1)  | 90.26(16) | O(3)#2-Cd(1)-C(1)   | 115.38(16) |
| O(2)-Cd(1)-C(1)    | 26.83(13) | O(6)-Cd(1)-C(1)     | 95.29(16)  |
| O(1)-Cd(1)-C(1)    | 27.23(13) | O(2)-C(1)-Cd(1)     | 61.1(3)    |
| C(19)-N(2)-Cd(1)#4 | 124.9(4)  | O(1)-C(1)-Cd(1)     | 62.5(3)    |
| C(20)-N(2)-Cd(1)#4 | 117.9(4)  | C(5)-C(1)-Cd(1)     | 173.5(4)   |
| C(1)-O(1)-Cd(1)    | 90.3(3)   | C(2)-O(3)-Cd(1)#2   | 163.5(4)   |
| C(1)-O(2)-Cd(1)    | 92.0(3)   | C(2)-O(4)-Cd(1)#5   | 106.1(4)   |
|                    |           | C(21)-O(6)-Cd(1)    | 121.4(5)   |

Symmetry transformations used to generate equivalent atoms: #1 x,y,z-1; #2 -x+1,-y+1,-z; #3 -x+2,y-1/2,-z+1/2;  
#4 -x+2,y+1/2,-z+1/2; #5 x,y,z+1

| compound 3         |            |                       |            |
|--------------------|------------|-----------------------|------------|
| Zn(1)-O(1)         | 1.912(4)   | O(1)-Zn(1)-O(3)#1     | 113.40(18) |
| Zn(1)-O(3)#1       | 1.967(4)   | O(1)-Zn(1)-N(1)#2     | 123.5(2)   |
| Zn(1)-N(1)#2       | 2.007(6)   | O(3)#1-Zn(1)-N(1)#2   | 122.2(2)   |
| Zn(1)-O(10)#3      | 2.124(5)   | O(1)-Zn(1)-O(10)#3    | 94.6(2)    |
| Zn(1)-O(9)         | 2.317(7)   | O(3)#1-Zn(1)-O(10)#3  | 90.5(2)    |
| Zn(1)-Zn(3)        | 3.0674(11) | N(1)#2-Zn(1)-O(10)#3  | 93.9(3)    |
| Zn(1)-Zn(2)        | 3.0883(11) | O(1)-Zn(1)-O(9)       | 88.7(2)    |
| Zn(2)-O(1)         | 1.906(4)   | O(3)#1-Zn(1)-O(9)     | 84.7(2)    |
| Zn(2)-O(11)#3      | 1.985(5)   | N(1)#2-Zn(1)-O(9)     | 87.4(3)    |
| Zn(2)-N(3)#4       | 2.013(6)   | O(10)#3-Zn(1)-O(9)    | 175.0(2)   |
| Zn(2)-O(13)#5      | 2.060(5)   | O(1)-Zn(1)-Zn(3)      | 38.14(12)  |
| Zn(3)-O(1)         | 1.959(4)   | O(3)#1-Zn(1)-Zn(3)    | 77.92(14)  |
| Zn(3)-O(4)#1       | 1.987(4)   | N(1)#2-Zn(1)-Zn(3)    | 159.51(19) |
| Zn(3)-O(15)        | 1.992(4)   | O(10)#3-Zn(1)-Zn(3)   | 81.25(18)  |
| Zn(3)-O(5)         | 1.994(5)   | O(9)-Zn(1)-Zn(3)      | 99.16(16)  |
| Zn(4)-O(14)#5      | 2.004(4)   | O(1)-Zn(1)-Zn(2)      | 35.94(11)  |
| Zn(4)-O(8)         | 2.009(5)   | O(3)#1-Zn(1)-Zn(2)    | 139.74(15) |
| Zn(4)-O(1)         | 2.031(4)   | N(1)#2-Zn(1)-Zn(2)    | 95.92(19)  |
| Zn(4)-O(16)        | 2.046(5)   | O(10)#3-Zn(1)-Zn(2)   | 73.04(14)  |
| Zn(4)-N(5)#6       | 2.190(6)   | O(9)-Zn(1)-Zn(2)      | 111.61(18) |
| N(1)-Zn(1)#7       | 2.007(6)   | Zn(3)-Zn(1)-Zn(2)     | 63.61(3)   |
| N(3)-Zn(2)#8       | 2.013(5)   | O(1)-Zn(2)-O(11)#3    | 109.03(17) |
| N(5)-Zn(4)#9       | 2.190(6)   | O(1)-Zn(2)-N(3)#4     | 139.2(2)   |
| O(3)-Zn(1)#3       | 1.967(4)   | O(11)#3-Zn(2)-N(3)#4  | 105.9(2)   |
| O(4)-Zn(3)#3       | 1.987(4)   | O(1)-Zn(2)-O(13)#5    | 102.19(19) |
| O(10)-Zn(1)#1      | 2.124(5)   | O(11)#3-Zn(2)-O(13)#5 | 99.6(2)    |
| O(11)-Zn(2)#1      | 1.985(5)   | N(3)#4-Zn(2)-O(13)#5  | 92.1(2)    |
| O(13)-Zn(2)#10     | 2.060(5)   | O(1)-Zn(2)-Zn(1)      | 36.09(11)  |
| O(14)-Zn(4)#10     | 2.004(4)   | O(11)#3-Zn(2)-Zn(1)   | 77.07(14)  |
| C(1)-N(1)-Zn(1)#7  | 123.6(5)   | N(3)#4-Zn(2)-Zn(1)    | 174.78(19) |
| C(5)-N(1)-Zn(1)#7  | 117.9(6)   | O(13)#5-Zn(2)-Zn(1)   | 91.67(15)  |
| C(25)-N(3)-Zn(2)#8 | 123.6(5)   | O(1)-Zn(3)-O(4)#1     | 107.59(18) |
| C(21)-N(3)-Zn(2)#8 | 117.8(5)   | O(1)-Zn(3)-O(15)      | 105.58(16) |
| C(45)-N(5)-Zn(4)#9 | 119.3(6)   | O(4)#1-Zn(3)-O(15)    | 114.41(19) |
| C(41)-N(5)-Zn(4)#9 | 124.8(6)   | O(1)-Zn(3)-O(5)       | 128.79(17) |
| Zn(2)-O(1)-Zn(1)   | 107.98(18) | O(4)#1-Zn(3)-O(5)     | 98.12(17)  |
| Zn(2)-O(1)-Zn(3)   | 114.2(2)   | O(15)-Zn(3)-O(5)      | 102.6(2)   |
| Zn(1)-O(1)-Zn(3)   | 104.80(17) | O(1)-Zn(3)-Zn(1)      | 37.07(11)  |
| Zn(2)-O(1)-Zn(4)   | 108.10(17) | O(4)#1-Zn(3)-Zn(1)    | 76.34(14)  |
| Zn(1)-O(1)-Zn(4)   | 116.4(2)   | O(15)-Zn(3)-Zn(1)     | 138.27(13) |

|                      |            |                      |            |
|----------------------|------------|----------------------|------------|
| Zn(3)-O(1)-Zn(4)     | 105.61(17) | O(5)-Zn(3)-Zn(1)     | 116.06(15) |
| C(19)-O(3)-Zn(1)#3   | 127.2(4)   | O(14)#5-Zn(4)-O(8)   | 133.9(2)   |
| C(19)-O(4)-Zn(3)#3   | 128.3(4)   | O(14)#5-Zn(4)-O(1)   | 99.60(16)  |
| C(20)-O(5)-Zn(3)     | 106.3(4)   | O(8)-Zn(4)-O(1)      | 94.57(18)  |
| C(39)-O(8)-Zn(4)     | 110.0(5)   | O(14)#5-Zn(4)-O(16)  | 104.5(2)   |
| C(39)-O(9)-Zn(1)     | 117.0(5)   | O(8)-Zn(4)-O(16)     | 119.3(2)   |
| C(40)-O(10)-Zn(1)#1  | 125.1(5)   | O(1)-Zn(4)-O(16)     | 89.30(19)  |
| C(40)-O(11)-Zn(2)#1  | 118.7(4)   | O(14)#5-Zn(4)-N(5)#6 | 85.2(2)    |
| C(59)-O(13)-Zn(2)#10 | 126.0(4)   | O(8)-Zn(4)-N(5)#6    | 84.0(2)    |
| C(59)-O(14)-Zn(4)#10 | 136.1(4)   | O(1)-Zn(4)-N(5)#6    | 174.5(2)   |
| C(60)-O(15)-Zn(3)    | 122.4(4)   | O(16)-Zn(4)-N(5)#6   | 86.7(3)    |
| C(60)-O(16)-Zn(4)    | 124.1(4)   |                      |            |

Symmetry transformations used to generate equivalent atoms: #1  $x+1/2, -y+1/2, z+1/2$ ; #2  $x, y, z+1$ ; #3  $x-1/2, -y+1/2, z-1/2$ ; #4  $x-1, -y, z-1/2$ ; #5  $x, -y, z+1/2$ ; #6  $x+1/2, -y-1/2, z+1/2$ ; #7  $x, y, z-1$ ; #8  $x+1, -y, z+1/2$ ; #9  $x-1/2, -y-1/2, z-1/2$ ; #10  $x, -y, z-1/2$

| compound 4    |           |                      |          |
|---------------|-----------|----------------------|----------|
| Cd(4)-O(13)#1 | 2.243(8)  | O(13)#1-Cd(4)-N(8)#2 | 87.8(3)  |
| Cd(4)-N(8)#2  | 2.318(9)  | O(13)#1-Cd(4)-O(12)  | 170.0(4) |
| Cd(4)-O(12)   | 2.344(8)  | N(8)#2-Cd(4)-O(12)   | 86.3(3)  |
| Cd(4)-O(17)   | 2.348(8)  | O(13)#1-Cd(4)-O(17)  | 88.9(3)  |
| Cd(4)-O(11)   | 2.350(7)  | N(8)#2-Cd(4)-O(17)   | 99.0(3)  |
| Cd(4)-O(5W)   | 2.358(9)  | O(12)-Cd(4)-O(17)    | 100.0(3) |
| Cd(4)-C(41)   | 2.691(11) | O(13)#1-Cd(4)-O(11)  | 128.8(3) |
| Cd(3)-O(16)#1 | 2.270(8)  | N(8)#2-Cd(4)-O(11)   | 140.5(3) |
| Cd(3)-N(6)#2  | 2.298(9)  | O(12)-Cd(4)-O(11)    | 55.2(3)  |
| Cd(3)-O(6W)   | 2.306(10) | O(17)-Cd(4)-O(11)    | 96.3(3)  |
| Cd(3)-O(19)   | 2.340(8)  | O(13)#1-Cd(4)-O(5W)  | 84.5(3)  |
| Cd(3)-O(14)#3 | 2.341(9)  | N(8)#2-Cd(4)-O(5W)   | 91.5(3)  |
| Cd(3)-O(18)   | 2.353(8)  | O(12)-Cd(4)-O(5W)    | 87.6(3)  |
| Cd(3)-C(62)   | 2.689(11) | O(17)-Cd(4)-O(5W)    | 167.4(3) |
| Cd(1)-O(2)    | 2.229(8)  | O(11)-Cd(4)-O(5W)    | 79.6(3)  |
| Cd(1)-O(1W)   | 2.304(10) | O(13)#1-Cd(4)-C(41)  | 155.3(4) |
| Cd(1)-N(4)    | 2.314(10) | N(8)#2-Cd(4)-C(41)   | 112.9(4) |
| Cd(1)-O(2W)   | 2.353(11) | O(12)-Cd(4)-C(41)    | 27.2(3)  |
| Cd(1)-O(3)#1  | 2.390(9)  | O(17)-Cd(4)-C(41)    | 100.5(3) |
| Cd(1)-O(4)#1  | 2.419(7)  | O(11)-Cd(4)-C(41)    | 28.0(3)  |
| Cd(1)-C(2)#1  | 2.756(12) | O(5W)-Cd(4)-C(41)    | 81.6(3)  |
| Cd(2)-O(9)    | 2.246(8)  | O(16)#1-Cd(3)-N(6)#2 | 89.5(3)  |
| Cd(2)-N(2)#4  | 2.318(9)  | O(16)#1-Cd(3)-O(6W)  | 81.8(3)  |

|                     |           |                       |          |
|---------------------|-----------|-----------------------|----------|
| Cd(2)-O(4W)         | 2.341(11) | N(6)#2-Cd(3)-O(6W)    | 91.3(3)  |
| Cd(2)-O(7)#5        | 2.374(7)  | O(16)#1-Cd(3)-O(19)   | 168.1(4) |
| Cd(2)-O(3W)         | 2.406(9)  | N(6)#2-Cd(3)-O(19)    | 85.5(3)  |
| Cd(2)-O(6)#5        | 2.431(8)  | O(6W)-Cd(3)-O(19)     | 87.5(3)  |
| Cd(2)-O(8)          | 2.603(9)  | O(16)#1-Cd(3)-O(14)#3 | 87.5(3)  |
| Cd(2)-C(21)#5       | 2.742(12) | N(6)#2-Cd(3)-O(14)#3  | 97.9(3)  |
| C(2)-Cd(1)#6        | 2.756(12) | O(6W)-Cd(3)-O(14)#3   | 165.8(3) |
| C(21)-Cd(2)#7       | 2.743(12) | O(19)-Cd(3)-O(14)#3   | 103.9(3) |
| N(2)-Cd(2)#8        | 2.318(9)  | O(16)#1-Cd(3)-O(18)   | 128.4(3) |
| N(6)-Cd(3)#2        | 2.298(9)  | N(6)#2-Cd(3)-O(18)    | 140.2(3) |
| N(8)-Cd(4)#2        | 2.318(9)  | O(6W)-Cd(3)-O(18)     | 83.7(3)  |
| O(3)-Cd(1)#6        | 2.390(9)  | O(19)-Cd(3)-O(18)     | 54.9(3)  |
| O(4)-Cd(1)#6        | 2.419(7)  | O(14)#3-Cd(3)-O(18)   | 95.9(3)  |
| O(6)-Cd(2)#7        | 2.431(8)  | O(16)#1-Cd(3)-C(62)   | 153.9(4) |
| O(7)-Cd(2)#7        | 2.374(7)  | N(6)#2-Cd(3)-C(62)    | 113.1(4) |
| O(13)-Cd(4)#6       | 2.243(8)  | O(6W)-Cd(3)-C(62)     | 84.6(4)  |
| O(14)-Cd(3)#9       | 2.341(9)  | O(19)-Cd(3)-C(62)     | 27.7(3)  |
| O(16)-Cd(3)#6       | 2.270(8)  | O(14)#3-Cd(3)-C(62)   | 101.5(3) |
| O(3)-C(2)-Cd(1)#6   | 60.0(7)   | O(18)-Cd(3)-C(62)     | 27.2(3)  |
| O(4)-C(2)-Cd(1)#6   | 61.3(6)   | O(2)-Cd(1)-O(1W)      | 92.1(4)  |
| C(3)-C(2)-Cd(1)#6   | 179.1(10) | O(2)-Cd(1)-N(4)       | 87.5(4)  |
| O(6)-C(21)-Cd(2)#7  | 62.4(7)   | O(1W)-Cd(1)-N(4)      | 96.3(4)  |
| O(7)-C(21)-Cd(2)#7  | 59.8(6)   | O(2)-Cd(1)-O(2W)      | 85.2(4)  |
| C(23)-C(21)-Cd(2)#7 | 178.1(10) | O(1W)-Cd(1)-O(2W)     | 173.2(4) |
| O(12)-C(41)-Cd(4)   | 60.5(6)   | N(4)-Cd(1)-O(2W)      | 89.8(4)  |
| O(11)-C(41)-Cd(4)   | 60.8(6)   | O(2)-Cd(1)-O(3)#1     | 172.8(4) |
| C(43)-C(41)-Cd(4)   | 175.4(9)  | O(1W)-Cd(1)-O(3)#1    | 91.9(4)  |
| O(18)-C(62)-Cd(3)   | 61.0(6)   | N(4)-Cd(1)-O(3)#1     | 86.1(3)  |
| O(19)-C(62)-Cd(3)   | 60.5(6)   | O(2W)-Cd(1)-O(3)#1    | 91.5(4)  |
| C(67)-C(62)-Cd(3)   | 177.9(11) | O(2)-Cd(1)-O(4)#1     | 132.3(3) |
| C(18)-N(2)-Cd(2)#8  | 122.8(8)  | O(1W)-Cd(1)-O(4)#1    | 91.5(3)  |
| C(19)-N(2)-Cd(2)#8  | 121.8(8)  | N(4)-Cd(1)-O(4)#1     | 139.2(3) |
| C(39)-N(4)-Cd(1)    | 122.3(8)  | O(2W)-Cd(1)-O(4)#1    | 85.8(3)  |
| C(38)-N(4)-Cd(1)    | 121.2(8)  | O(3)#1-Cd(1)-O(4)#1   | 53.6(3)  |
| C(58)-N(6)-Cd(3)#2  | 121.8(8)  | O(2)-Cd(1)-C(2)#1     | 159.2(4) |
| C(59)-N(6)-Cd(3)#2  | 122.4(8)  | O(1W)-Cd(1)-C(2)#1    | 91.3(4)  |
| C(79)-N(8)-Cd(4)#2  | 121.9(8)  | N(4)-Cd(1)-C(2)#1     | 112.6(4) |
| C(78)-N(8)-Cd(4)#2  | 122.1(8)  | O(2W)-Cd(1)-C(2)#1    | 89.1(4)  |
| C(1)-O(2)-Cd(1)     | 105.0(8)  | O(3)#1-Cd(1)-C(2)#1   | 26.6(3)  |
| C(2)-O(3)-Cd(1)#6   | 93.4(8)   | O(4)#1-Cd(1)-C(2)#1   | 27.0(3)  |
| C(2)-O(4)-Cd(1)#6   | 91.7(7)   | O(9)-Cd(2)-N(2)#4     | 86.4(3)  |
| C(21)-O(6)-Cd(2)#7  | 91.0(8)   | O(9)-Cd(2)-O(4W)      | 91.5(4)  |
| C(21)-O(7)-Cd(2)#7  | 92.9(7)   | N(2)#4-Cd(2)-O(4W)    | 93.3(4)  |
| C(22)-O(8)-Cd(2)    | 83.8(7)   | O(9)-Cd(2)-O(7)#5     | 134.8(3) |

|                      |          |                     |          |
|----------------------|----------|---------------------|----------|
| C(22)-O(9)-Cd(2)     | 101.5(8) | N(2)#4-Cd(2)-O(7)#5 | 138.7(3) |
| C(41)-O(11)-Cd(4)    | 91.2(7)  | O(4W)-Cd(2)-O(7)#5  | 86.9(3)  |
| C(41)-O(12)-Cd(4)    | 92.3(7)  | O(9)-Cd(2)-O(3W)    | 88.5(3)  |
| C(42)-O(13)-Cd(4)#6  | 104.8(7) | N(2)#4-Cd(2)-O(3W)  | 95.3(3)  |
| C(42)-O(14)-Cd(3)#9  | 117.0(8) | O(4W)-Cd(2)-O(3W)   | 171.4(3) |
| C(61)-O(16)-Cd(3)#6  | 106.9(8) | O(7)#5-Cd(2)-O(3W)  | 87.1(3)  |
| C(61)-O(17)-Cd(4)    | 116.5(7) | O(9)-Cd(2)-O(6)#5   | 170.6(3) |
| C(62)-O(18)-Cd(3)    | 91.8(7)  | N(2)#4-Cd(2)-O(6)#5 | 85.0(3)  |
| C(62)-O(19)-Cd(3)    | 91.8(8)  | O(4W)-Cd(2)-O(6)#5  | 92.8(4)  |
| O(6)#5-Cd(2)-O(8)    | 136.2(3) | O(7)#5-Cd(2)-O(6)#5 | 53.8(3)  |
| O(9)-Cd(2)-C(21)#5   | 162.0(4) | O(3W)-Cd(2)-O(6)#5  | 88.5(3)  |
| N(2)#4-Cd(2)-C(21)#5 | 111.5(4) | O(9)-Cd(2)-O(8)     | 52.7(3)  |
| O(4W)-Cd(2)-C(21)#5  | 89.0(4)  | N(2)#4-Cd(2)-O(8)   | 138.7(3) |
| O(7)#5-Cd(2)-C(21)#5 | 27.3(3)  | O(4W)-Cd(2)-O(8)    | 83.8(3)  |
| O(3W)-Cd(2)-C(21)#5  | 88.4(3)  | O(7)#5-Cd(2)-O(8)   | 82.3(3)  |
| O(6)#5-Cd(2)-C(21)#5 | 26.6(3)  | O(3W)-Cd(2)-O(8)    | 89.4(3)  |
| O(8)-Cd(2)-C(21)#5   | 109.6(3) |                     |          |

Symmetry transformations used to generate equivalent atoms: #1  $x, -y+1, z+1/2$ ; #2  $-x+3/2, -y+1/2, -z+2$ ; #3  $x, y, z+1$ ; #4  $x, y+1, z$ ; #5  $x, -y+2, z-1/2$ ; #6  $x, -y+1, z-1/2$ ; #7  $x, -y+2, z+1/2$ ; #8  $x, y-1, z$ ; #9  $x, y, z-1$

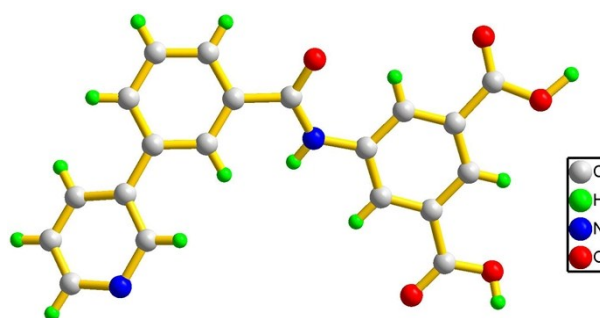

**Fig. S1.** Crystal structure of 3-H<sub>2</sub>PBI ligand.

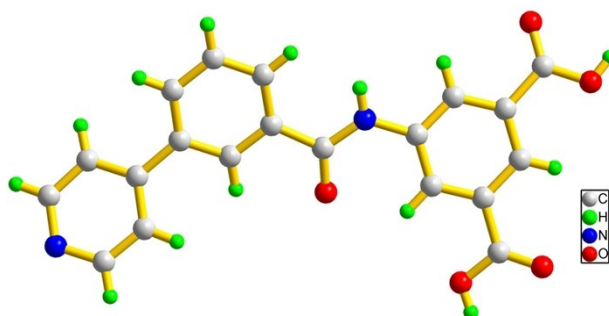

**Fig. S2.** Crystal structure of 4-H<sub>2</sub>PBI ligand.

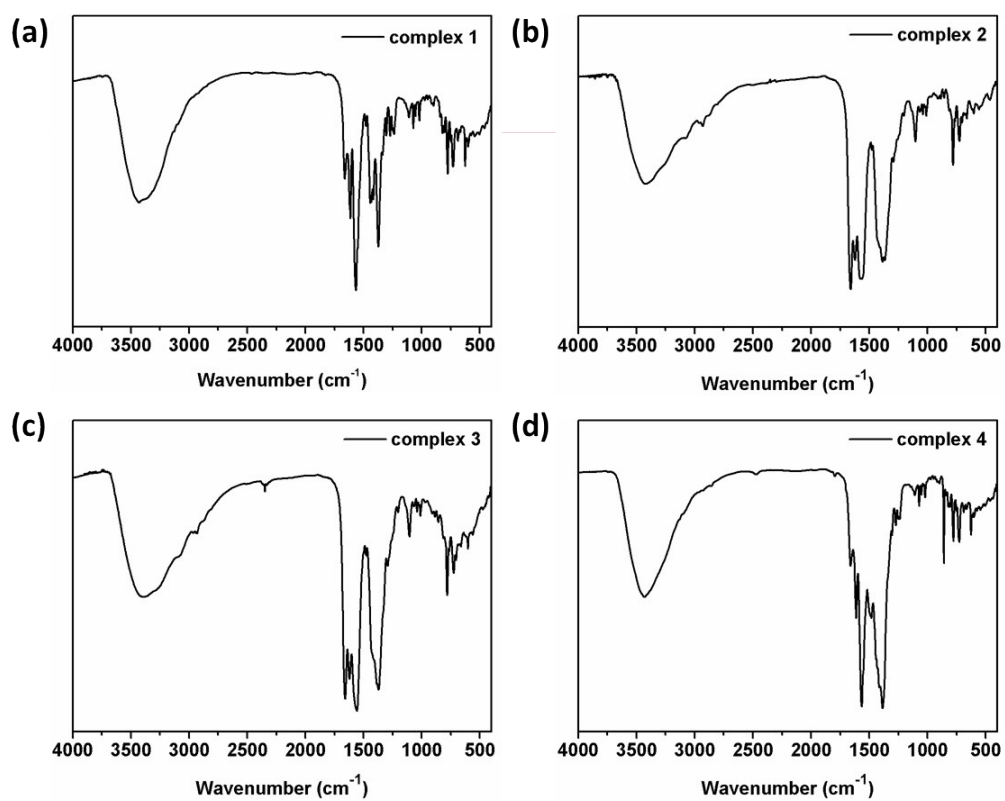

**Fig. S3.** FT-IR spectrum of the obtained compounds 1-4.

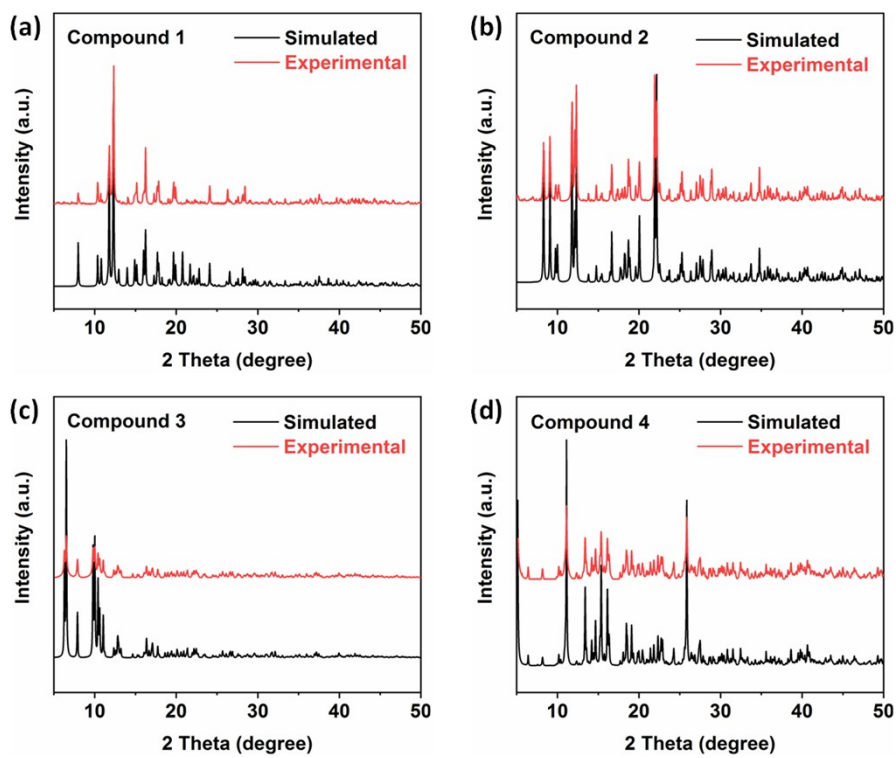

Fig. S4. PXRD patterns of compounds 1-4.

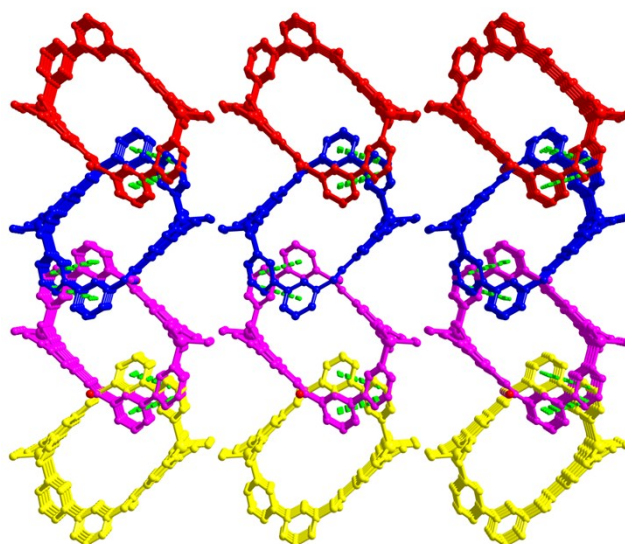

Fig. S5. Schematic view of the 2D layers in compound 1.



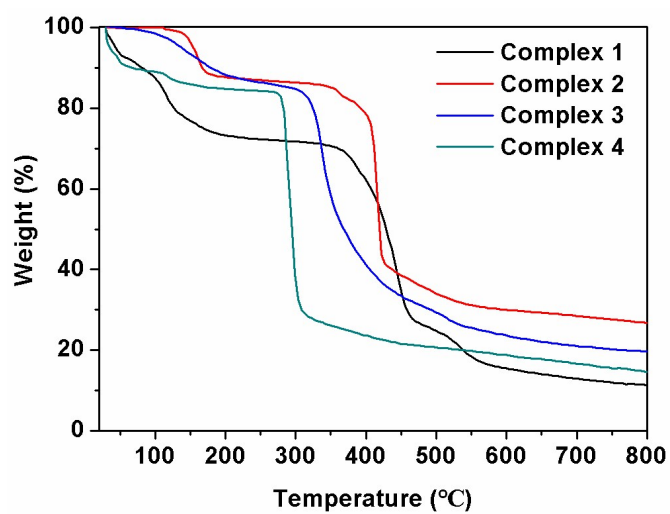

Fig. S6. TG curves of compounds 1-4.

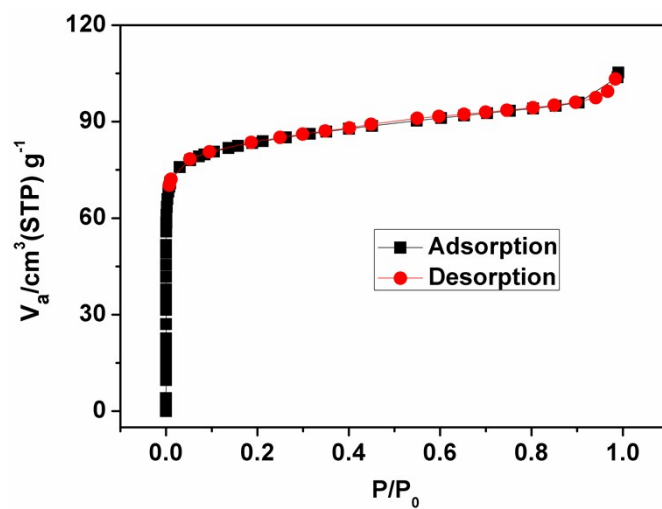

Fig. S7.  $\text{N}_2$  adsorption/desorption isotherms of Cd-CP at 77 K.
